# Supplementary material for: Caspase 9 and Caspase 3 Immunohistochemical Pattern in Skeletal and Cardiac Muscles at Different Times after Death: An Experimental Study on PMI Estimation
Source: MDPI journal article supplement (doi:10.3390/diagnostics11061062), 2021-06-09
Supplement: s1 [file s1]

## Supplementary material

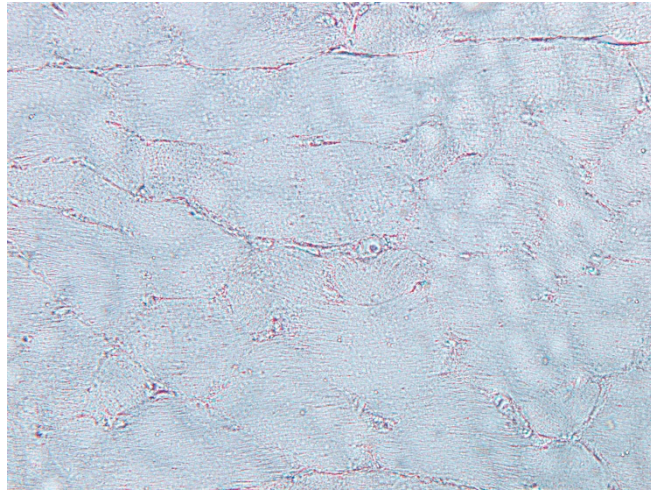

**Supplementary Figure S1.** Representative image of negative controls obtained, using PBS, from skeletal muscle (10×).

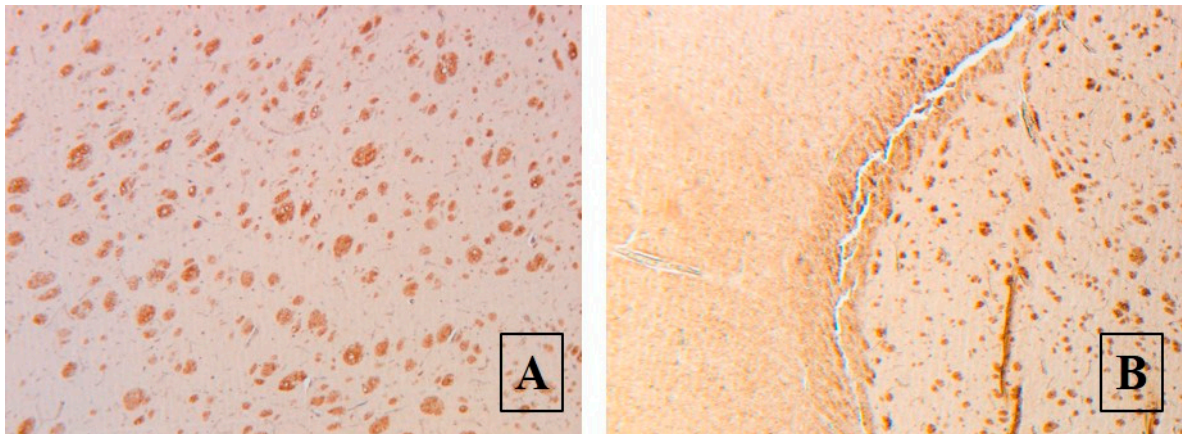

**Supplementary Figure S2.** Representative image of mice brain section used as positive control (Caspase 9 (A: 10×); Caspase 3 (B: 10×)).
